# Supplementary material for: Unveiling the high reactivity of experimental pseudodiradical azomethine ylides within molecular electron density theory
Source: Royal Society of Chemistry journal article supplement (doi:10.1039/d2cp05032c), 2022-11-22
Supplement: d2cp05032c1.pdf [file d2cp05032c1.pdf]

## Electronic Supplementary Information

### Unveiling the High Reactivity of Experimental *Pseudodiradical* Azomethine Ylides within Molecular Electron Density Theory

Mar Ríos-Gutiérrez,<sup>a\*</sup> Luis R. Domingo<sup>a</sup> and Radomir Jasiński<sup>b\*</sup>

<sup>a</sup>Department of Organic Chemistry, University of Valencia, Dr. Moliner 50, Burjassot, 46100 Valencia, Spain. E-mail: rios@utopia.uv.es

<sup>b</sup>Faculty of Chemical Engineering and Technology, Department of Organic Chemistry and Technology, Cracow University of Technology, Warszawska 24, 31-155 Cracow, Poland. E-mail: radomir@chemia.pk.edu.pl

#### Index

- S3 **Figure S1** including ELF topological analysis of experimental non-stabilized *N*-phenyl and *N*-benzyl AYs **23** and **24**.
- S4 **Table S1** including  $\omega$ B97X-D/6-311G(d) total energies of the stationary points involved in the 32CA reactions of AY **18** with styrene **25**, benzaldehyde **26**, and MFB **21**, in gas phase and in benzene.
- S5 **Table S2** including  $\omega$ B97X-D/6-311G(d) absolute enthalpies, entropies, and Gibbs free energies of the stationary points involved in the 32CA reactions of AY **18** with styrene **25**, benzaldehyde **26**, and MBF **21**.
- S6 **Table S3** including C1–C(O)4 and C3–C5 distances at the  $\omega$ B97X-D/6-311G(d) optimized geometries of the TSs associated with the 32CA reactions of AY **18** with styrene **25**, benzaldehyde **26** and MFB **21**, in gas phase and in solvent.
- S7 **Table S4** including the most relevant ELF valence basin populations, IRC values and distances of the C–C forming bonds, at the IRC structures defining the topological phases associated with the molecular mechanism along the more favorable *exo* stereoisomeric path of the 32CA reaction between AY **18** and styrene **25**.
- S8 **Table S5** including most relevant ELF valence basin populations, IRC values and distances of the C–C forming bonds, at the IRC structures defining the topological phases associated with the molecular mechanism along the more favorable *endo* stereoisomeric path of the 32CA reaction between AY **18** and benzaldehyde **26**.
- S9 **Figure S2** including ELF topological analysis of **S1** along the IRCs associated with the *exo* and *endo* stereoisomeric reaction paths of the 32CA reactions of AY **18** with styrene

**25** and benzaldehyde **26**, respectively, showing the orientation of the carbon *pseudoradical* centers.

- S10 Cartesian coordinates of the stationary points involved in the 32CA reaction between AY **18** and styrene **25**.
- S14 Cartesian coordinates of the stationary points involved in the 32CA reaction between AY **18** and benzaldehyde **26**.
- S18 Cartesian coordinates of the stationary points involved in the 32CA reaction between AY **18** and MFB **21**.

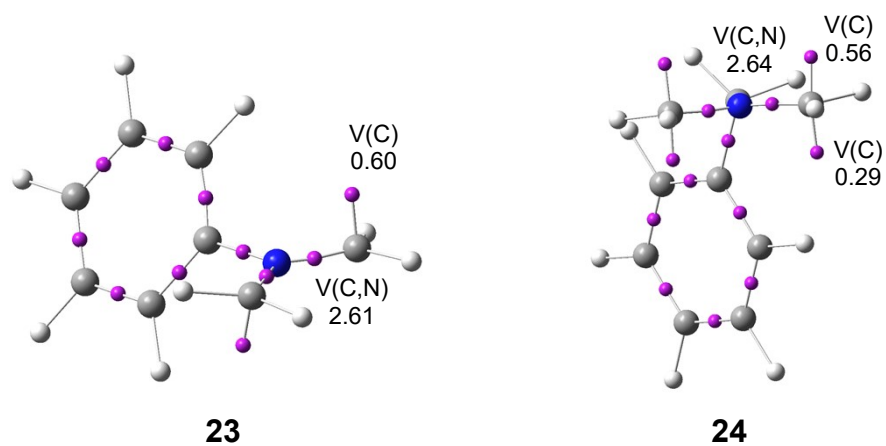

**Figure S1.** ELF topological analysis of experimental non-stabilized *N*-phenyl and *N*-benzyl AYs **23** and **24**. Populations of the V(C) monosynaptic and V(C,N) disynaptic basins are given in average number of electrons, e.

**Table S1.**  $\omega$ B97X-D/6-311G(d) total energies, in Hartree, of the stationary points involved in the 32CA reactions of AY **18** with styrene **25**, benzaldehyde **26**, and MFB **21**, in gas phase and in benzene.

| Structure       | <i>Gas phase</i> | <i>Benzene</i> |
|-----------------|------------------|----------------|
| <b>18</b>       | -173.180313      | -173.182240    |
| <b>25</b>       | -309.608774      | -309.610501    |
| <b>MC-I</b>     | -482.802934      | -482.805255    |
| <b>TS-I-n</b>   | -482.796095      | -482.798665    |
| <b>TS-I-x</b>   | -482.796838      | -482.799795    |
| <b>CA-I-n</b>   | -482.908875      | -482.910521    |
| <b>CA-I-x</b>   | -482.905347      | -482.907293    |
| <b>26</b>       | -345.535472      | -345.538400    |
| <b>MC-II</b>    | -518.732018      | -518.735696    |
| <b>TS-II-n</b>  | -518.730011      | -518.734516    |
| <b>TS-II-x</b>  | -518.727332      | -518.731996    |
| <b>CA-II-n</b>  | -518.801309      | -518.804111    |
| <b>CA-II-x</b>  | -518.801415      | -518.804461    |
| <b>21</b>       | -573.396588      | -573.400651    |
| <b>MC-III</b>   | -746.595529      | -746.600707    |
| <b>TS-III-n</b> | -746.595013      | -746.600413    |
| <b>TS-III-x</b> | -746.592999      | -746.598060    |
| <b>TS-IV-n</b>  | -746.582284      | -746.587436    |
| <b>TS-IV-x</b>  | -746.577104      | -746.583584    |
| <b>CA-III-n</b> | -746.669846      | -746.673471    |
| <b>CA-III-x</b> | -746.669761      | -746.673476    |
| <b>CA-IV-n</b>  | -746.633327      | -746.637862    |
| <b>CA-IV-x</b>  | -746.639417      | -746.643600    |

**Table S2.**  $\omega$ B97X-D/6-311G(d) absolute enthalpies (H, in Hartree), entropies (S, in cal·mol<sup>-1</sup>K<sup>-1</sup>), and Gibbs free energies (G, in Hartree), computed at 353.25 K in benzene, of the stationary points involved in the 32CA reactions of AY **18** with styrene **25**, benzaldehyde **26**, and MBF **21**.

| Structure       | H           | S     | G           |
|-----------------|-------------|-------|-------------|
| <b>18</b>       | -173.078211 | 74.2  | -173.119988 |
| <b>25</b>       | -309.467154 | 82.0  | -309.513336 |
| <b>MC-I</b>     | -482.554237 | 123.8 | -482.623918 |
| <b>TS-I-n</b>   | -482.548348 | 115.8 | -482.613526 |
| <b>TS-I-x</b>   | -482.549728 | 116.1 | -482.615062 |
| <b>CA-I-n</b>   | -482.654957 | 109.1 | -482.716400 |
| <b>CA-I-x</b>   | -482.651830 | 110.4 | -482.713976 |
| <b>26</b>       | -345.418068 | 84.1  | -345.465420 |
| <b>MC-II</b>    | -518.508656 | 119.2 | -518.575767 |
| <b>TS-II-n</b>  | -518.508140 | 112.9 | -518.571704 |
| <b>TS-II-x</b>  | -518.505783 | 115.6 | -518.570840 |
| <b>CA-II-n</b>  | -518.572723 | 108.4 | -518.633740 |
| <b>CA-II-x</b>  | -518.573092 | 109.1 | -518.634486 |
| <b>21</b>       | -573.231123 | 111.5 | -573.293872 |
| <b>MC-III</b>   | -746.324313 | 142.8 | -746.404712 |
| <b>TS-III-n</b> | -746.324580 | 138.9 | -746.402790 |
| <b>TS-III-x</b> | -746.322592 | 140.5 | -746.401695 |
| <b>TS-IV-n</b>  | -746.312135 | 136.5 | -746.388948 |
| <b>TS-IV-x</b>  | -746.308510 | 138.9 | -746.386682 |
| <b>CA-III-n</b> | -746.392813 | 132.5 | -746.467377 |
| <b>CA-III-x</b> | -746.392793 | 133.7 | -746.468033 |
| <b>CA-IV-n</b>  | -746.358674 | 131.1 | -746.432470 |
| <b>CA-IV-x</b>  | -746.364407 | 132.8 | -746.439174 |

**Table S3.** C1–C(O)4 and C3–C5 distances, in angstroms Å, at the  $\omega$ B97X-D/6-311G(d) optimized geometries of the TSs associated with the 32CA reactions of AY **18** with styrene **25**, benzaldehyde **26** and MFB **21**, in gas phase and in solvent.

| Structure       | <i>Gas phase</i> |          | <i>Benzene</i> |          |
|-----------------|------------------|----------|----------------|----------|
|                 | C3–C5            | C1–C(O)4 | C3–C5          | C1–C(O)4 |
| <b>TS-I-n</b>   | 2.514            | 2.402    | 2.523          | 2.401    |
| <b>TS-I-x</b>   | 2.602            | 2.420    | 2.613          | 2.415    |
| <b>TS-II-n</b>  | 2.238            | 2.571    | 2.291          | 2.661    |
| <b>TS-II-x</b>  | 2.284            | 2.490    | 2.354          | 2.587    |
| <b>TS-III-n</b> | 2.576            | 2.834    | 2.358          | 2.672    |
| <b>TS-III-n</b> | 2.397            | 2.636    | 2.503          | 2.792    |
| <b>TS-IV-n</b>  | 2.105            | 2.664    | 2.071          | 2.739    |
| <b>TS-IV-x</b>  | 2.130            | 2.643    | 2.162          | 2.702    |

**Table S4.** Most relevant ELF valence basin populations, IRC values and distances of the C–C forming bonds, at the IRC structures **S1** – **S8** defining the seven topological phases associated with the molecular mechanism along the more favorable *exo* stereoisomeric path of the 32CA reaction between AY **18** and styrene **25**. Distances are given in angstroms, Å, IRC coordinates in Å·amu<sup>1/2</sup>, and electron populations in average number of electrons, e.

| Structures | <b>S1</b> | <b>S2</b> | <b>S3</b>  | <b>S4</b> | <b>S5</b> | <b>S6</b> | <b>S7</b>  | <b>S8</b> |
|------------|-----------|-----------|------------|-----------|-----------|-----------|------------|-----------|
| Phases     | <i>I</i>  | <i>II</i> | <i>III</i> | <i>IV</i> | <i>V</i>  | <i>VI</i> | <i>VII</i> |           |
| d(C1–C4)   | 2.875     | 2.444     | 2.381      | 2.193     | 2.151     | 2.069     | 1.712      | 1.542     |
| d(C3–C5)   | 2.936     | 2.621     | 2.579      | 2.452     | 2.423     | 2.366     | 2.056      | 1.579     |
| IRC        | -2.74     | 0.12      | 0.48       | 1.55      | 1.79      | 2.27      | 4.53       | 7.39      |
| V(C1,N2)   | 2.64      | 2.51      | 2.42       | 2.17      | 2.12      | 2.03      | 1.77       | 1.71      |
| V(N2)      |           | 0.33      | 0.49       | 1.03      | 1.15      | 1.36      | 1.97       | 2.22      |
| V(N2,C3)   | 2.70      | 2.60      | 2.54       | 2.33      | 2.28      | 2.20      | 1.94       | 1.74      |
| V(C4,C5)   | 1.63      | 1.58      | 3.24       | 3.03      | 2.78      | 2.54      | 2.07       | 1.88      |
| V'(C4,C5)  | 1.72      | 1.70      |            |           |           |           |            |           |
| V(C1)      | 0.53      | 0.68      | 0.71       | 0.78      | 0.80      |           |            |           |
| V(C3)      | 0.45      | 0.52      | 0.53       | 0.57      | 0.59      | 0.60      |            |           |
| V(C4)      |           |           |            | 0.26      | 0.33      |           |            |           |
| V(C5)      |           |           |            |           | 0.17      | 0.37      |            |           |
| V(C1,C4)   |           |           |            |           |           | 1.27      | 1.69       | 1.88      |
| V(C3,C5)   |           |           |            |           |           |           | 1.43       | 1.83      |

**Table S5.** Most relevant ELF valence basin populations, IRC values and distances of the C–C forming bonds, at the IRC structures **S1** – **S9** defining the eight topological phases associated with the molecular mechanism along the more favorable *endo* stereoisomeric path of the 32CA reaction between AY **18** and benzaldehyde **26**. Distances are given in angstroms, Å, IRC coordinates in Å·amu<sup>1/2</sup>, and electron populations in average number of electrons, e.

| Structures | <b>S1</b> | <b>S2</b> | <b>S3</b>  | <b>S4</b> | <b>S5</b> | <b>S6</b> | <b>S7</b>  | <b>S8</b>   | <b>S9</b> |
|------------|-----------|-----------|------------|-----------|-----------|-----------|------------|-------------|-----------|
| Phases     | <i>I</i>  | <i>II</i> | <i>III</i> | <i>IV</i> | <i>V</i>  | <i>VI</i> | <i>VII</i> | <i>VIII</i> |           |
| d(C1–O4)   | 2.876     | 2.786     | 2.551      | 2.518     | 2.382     | 2.022     | 1.807      | 1.776       | 1.445     |
| d(C3–C5)   | 2.656     | 2.587     | 2.141      | 2.047     | 1.743     | 1.6       | 1.575      | 1.573       | 1.546     |
| IRC        | -3.96     | -2.31     | 0.66       | 1.16      | 2.81      | 4.95      | 6.11       | 6.28        | 8.25      |
| V(C1,N2)   | 2.83      | 2.88      | 3.27       | 3.34      | 2.97      | 2.45      | 2.24       | 2.21        | 1.85      |
| V(N2)      |           |           |            |           | 0.69      | 1.52      | 1.81       | 1.84        | 2.12      |
| V(N2,C3)   | 2.51      | 2.49      | 2.34       | 2.27      | 1.97      | 1.72      | 1.65       | 1.65        | 1.64      |
| V(O4,C5)   | 2.31      | 2.30      | 2.05       | 1.92      | 1.62      | 1.44      | 1.38       | 1.37        | 1.28      |
| V(C1)      | 0.27      |           |            |           |           | 0.15      | 0.29       |             |           |
| V(C3)      | 0.83      | 0.86      | 0.99       |           |           |           |            |             |           |
| V(O4)      | 2.60      | 2.70      | 2.78       | 2.77      | 2.94      | 2.97      | 2.71       | 2.70        | 2.44      |
| V'(O4)     | 2.66      | 2.58      | 2.73       | 2.82      | 2.86      | 2.86      | 2.73       | 2.71        | 2.52      |
| V''(O4)    |           |           |            |           |           |           | 0.34       |             |           |
| V(C5)      |           |           | 0.12       |           |           |           |            |             |           |
| V(C1,O4)   |           |           |            |           |           |           |            | 0.68        | 1.26      |
| V(C3,C5)   |           |           |            | 1.26      | 1.63      | 1.83      | 1.88       | 1.88        | 1.93      |



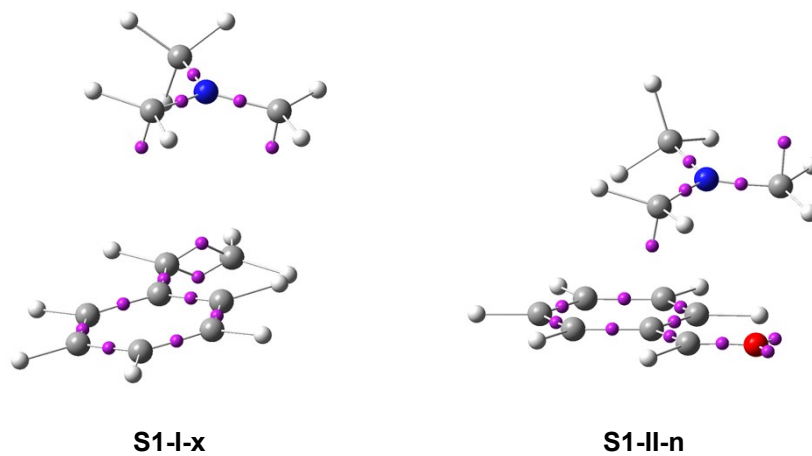

**Figure S2.** ELF topological analysis of **S1** along the IRCs associated with the *exo* and *endo* stereoisomeric reaction paths of the 32CA reactions of AY **18** with styrene **25** and benzaldehyde **26**, respectively, showing the orientation of the carbon *pseudoradical* centers.

Cartesian coordinates of the stationary points involved in the 32CA reaction between AY **18** and styrene **25**.

**AY 18**

E = -173.168460572 a.u.

|   |           |           |           |
|---|-----------|-----------|-----------|
| 6 | 0.717551  | -1.197831 | -0.009586 |
| 1 | 0.097918  | -2.078397 | -0.014957 |
| 1 | 1.794746  | -1.255224 | 0.032800  |
| 6 | 0.717596  | 1.197806  | -0.009538 |
| 1 | 0.098001  | 2.078398  | -0.014875 |
| 1 | 1.794794  | 1.255154  | 0.032844  |
| 6 | -1.332194 | 0.000021  | 0.007680  |
| 1 | -1.703510 | -0.886226 | -0.502572 |
| 1 | -1.666534 | -0.000076 | 1.044755  |
| 1 | -1.703485 | 0.886378  | -0.502400 |
| 7 | 0.139412  | -0.000001 | -0.025290 |

**Styrene 25**

E = -309.595264231 a.u.

|   |           |           |           |
|---|-----------|-----------|-----------|
| 6 | -1.349747 | -0.786408 | 0.087395  |
| 6 | 0.039610  | -0.851671 | 0.134792  |
| 6 | 0.799305  | 0.303931  | 0.042402  |
| 6 | 0.188553  | 1.554806  | -0.099809 |
| 6 | -1.207153 | 1.603237  | -0.145721 |
| 6 | -1.971159 | 0.446980  | -0.053392 |
| 1 | -1.941611 | -1.692733 | 0.159973  |
| 1 | 0.533885  | -1.811480 | 0.244667  |
| 1 | 1.880762  | 0.227438  | 0.081847  |
| 1 | -1.701591 | 2.564322  | -0.255727 |
| 1 | -3.053617 | 0.511233  | -0.091651 |
| 6 | 0.948056  | 2.814048  | -0.202497 |
| 6 | 2.269774  | 2.964618  | -0.178527 |
| 1 | 0.334518  | 3.707165  | -0.309260 |
| 1 | 2.717711  | 3.948286  | -0.263024 |
| 1 | 2.957309  | 2.131037  | -0.075497 |

**MC-I**

E = -482.777141673 a.u.

|   |           |           |           |
|---|-----------|-----------|-----------|
| 6 | -2.088428 | -0.170627 | 1.579361  |
| 6 | -2.719176 | -0.664976 | -0.668038 |
| 1 | -1.481624 | -0.471667 | 2.416750  |

|   |           |           |           |
|---|-----------|-----------|-----------|
| 1 | -2.754991 | 0.676280  | 1.630570  |
| 1 | -2.595685 | -1.352875 | -1.488073 |
| 1 | -3.423544 | 0.150666  | -0.702809 |
| 7 | -2.052404 | -0.886754 | 0.460278  |
| 6 | -1.101747 | -2.010298 | 0.431514  |
| 1 | -0.231405 | -1.722080 | -0.155208 |
| 1 | -0.800746 | -2.258099 | 1.445789  |
| 1 | -1.587791 | -2.872416 | -0.023139 |
| 6 | -0.412725 | 1.940676  | -0.019476 |
| 6 | -1.309450 | 2.226137  | -0.961820 |
| 1 | -2.090622 | 2.958072  | -0.783925 |
| 1 | -1.321213 | 1.734518  | -1.927852 |
| 6 | 0.680225  | 0.958610  | -0.134325 |
| 6 | 1.077013  | 0.412974  | -1.357519 |
| 6 | 1.336270  | 0.523251  | 1.020601  |
| 6 | 2.078097  | -0.547162 | -1.420918 |
| 1 | 0.596254  | 0.743064  | -2.272139 |
| 6 | 2.336177  | -0.436885 | 0.963581  |
| 1 | 1.036881  | 0.933586  | 1.979888  |
| 6 | 2.708823  | -0.982102 | -0.260246 |
| 1 | 2.370933  | -0.953779 | -2.383547 |
| 1 | 2.824798  | -0.762209 | 1.876450  |
| 1 | 3.492062  | -1.731270 | -0.310536 |
| 1 | -0.479635 | 2.449337  | 0.939253  |

**TS-I-n**

E = -482.796094720 a.u.

|   |          |           |           |
|---|----------|-----------|-----------|
| 6 | 0.505802 | -1.469984 | -0.156852 |
| 6 | 1.419578 | -1.435337 | -1.170542 |
| 1 | 2.170118 | -2.210819 | -1.250196 |
| 1 | 1.257803 | -0.854230 | -2.070010 |
| 6 | 1.703020 | -0.008097 | 1.501309  |
| 6 | 3.089009 | 0.103793  | -0.387099 |
| 1 | 0.991297 | 0.500594  | 2.132948  |
| 1 | 2.216112 | -0.885902 | 1.863295  |
| 1 | 3.485503 | 0.736297  | -1.168236 |
| 1 | 3.686198 | -0.727668 | -0.043731 |
| 7 | 2.269415 | 0.678043  | 0.508615  |
| 6 | 1.613948 | 1.924400  | 0.103678  |
| 1 | 0.797595 | 1.697816  | -0.583400 |
| 1 | 1.216092 | 2.424863  | 0.984547  |

|   |           |           |           |
|---|-----------|-----------|-----------|
| 1 | 2.343220  | 2.572786  | -0.379992 |
| 6 | -0.771770 | -0.729402 | -0.132914 |
| 6 | -1.211849 | 0.065880  | -1.197967 |
| 6 | -1.612203 | -0.829546 | 0.983425  |
| 6 | -2.417044 | 0.753171  | -1.134521 |
| 1 | -0.610799 | 0.142633  | -2.097534 |
| 6 | -2.819840 | -0.151602 | 1.046248  |
| 1 | -1.298568 | -1.446574 | 1.820282  |
| 6 | -3.229044 | 0.653562  | -0.011549 |
| 1 | -2.729261 | 1.362279  | -1.976294 |
| 1 | -3.446052 | -0.250924 | 1.926471  |
| 1 | -4.171566 | 1.186760  | 0.034984  |
| 1 | 0.588765  | -2.255237 | 0.587274  |

**TS-I-x**

E = -482.796837602 a.u.

|   |           |           |           |
|---|-----------|-----------|-----------|
| 6 | -3.538572 | 0.064101  | -0.609695 |
| 6 | -2.693801 | 1.167865  | -0.611718 |
| 6 | -1.434571 | 1.092661  | -0.032509 |
| 6 | -0.984454 | -0.089107 | 0.570171  |
| 6 | -1.846372 | -1.192293 | 0.557608  |
| 6 | -3.105037 | -1.118381 | -0.020616 |
| 1 | -4.521251 | 0.124043  | -1.063170 |
| 1 | -3.016849 | 2.096062  | -1.071002 |
| 1 | -0.790047 | 1.964962  | -0.053246 |
| 1 | -1.517222 | -2.121460 | 1.012786  |
| 1 | -3.752266 | -1.988817 | -0.011063 |
| 6 | 0.346080  | -0.204945 | 1.186624  |
| 1 | 0.616671  | -1.197865 | 1.530404  |
| 6 | 1.131722  | 0.850633  | 1.533271  |
| 1 | 0.780206  | 1.872248  | 1.459393  |
| 1 | 1.999704  | 0.700761  | 2.163808  |
| 6 | 1.483644  | -0.828137 | -1.069166 |
| 6 | 2.469346  | 1.217195  | -0.450107 |
| 1 | 1.622880  | -1.889564 | -1.204955 |
| 1 | 0.627705  | -0.332225 | -1.498731 |
| 1 | 3.390365  | 1.723347  | -0.201842 |
| 1 | 1.672208  | 1.775025  | -0.919106 |
| 7 | 2.540912  | -0.093871 | -0.730635 |
| 6 | 3.697667  | -0.810645 | -0.194842 |
| 1 | 3.523835  | -1.026271 | 0.862614  |

|   |          |           |           |
|---|----------|-----------|-----------|
| 1 | 3.834385 | -1.741492 | -0.742630 |
| 1 | 4.589379 | -0.195333 | -0.302948 |

**CA-I-n**

E = -482.881840853 a.u.

|   |           |           |           |
|---|-----------|-----------|-----------|
| 6 | -1.481619 | -0.532619 | 1.102578  |
| 6 | -2.852042 | 0.557498  | -0.421284 |
| 1 | -0.884531 | -1.445999 | 1.143268  |
| 1 | -1.804705 | -0.314147 | 2.125084  |
| 1 | -3.482083 | 0.442018  | -1.305958 |
| 1 | -3.367530 | 1.242336  | 0.263308  |
| 7 | -2.657722 | -0.728045 | 0.247906  |
| 6 | -2.516357 | -1.828412 | -0.689596 |
| 1 | -1.692999 | -1.711883 | -1.417225 |
| 1 | -2.347884 | -2.757226 | -0.140224 |
| 1 | -3.444690 | -1.946628 | -1.253758 |
| 6 | -0.663821 | 0.680515  | 0.544984  |
| 6 | -1.443166 | 1.078120  | -0.724588 |
| 1 | -1.403483 | 2.152522  | -0.917307 |
| 1 | -1.029368 | 0.573109  | -1.602625 |
| 6 | 0.805415  | 0.417144  | 0.319540  |
| 6 | 1.235234  | -0.646218 | -0.478117 |
| 6 | 1.773128  | 1.239765  | 0.892470  |
| 6 | 2.585672  | -0.876910 | -0.697197 |
| 1 | 0.502687  | -1.307465 | -0.932870 |
| 6 | 3.128549  | 1.013419  | 0.677382  |
| 1 | 1.461866  | 2.072549  | 1.517119  |
| 6 | 3.540081  | -0.046210 | -0.119075 |
| 1 | 2.895807  | -1.709620 | -1.320421 |
| 1 | 3.863289  | 1.667826  | 1.135427  |
| 1 | 4.596507  | -0.226645 | -0.288002 |
| 1 | -0.749065 | 1.502236  | 1.263326  |

**CA-I-x**

E = -482.882999500 a.u.

|   |           |           |           |
|---|-----------|-----------|-----------|
| 6 | -3.597875 | 0.063947  | -0.293538 |
| 6 | -2.712964 | 1.052611  | -0.711589 |
| 6 | -1.353015 | 0.917404  | -0.472186 |
| 6 | -0.845834 | -0.203346 | 0.190625  |
| 6 | -1.743943 | -1.185730 | 0.601661  |
| 6 | -3.108232 | -1.056348 | 0.363772  |

|   |           |           |           |
|---|-----------|-----------|-----------|
| 1 | -4.661680 | 0.168532  | -0.479312 |
| 1 | -3.085041 | 1.932599  | -1.226504 |
| 1 | -0.673340 | 1.697804  | -0.804636 |
| 1 | -1.370898 | -2.065781 | 1.118450  |
| 1 | -3.789123 | -1.833679 | 0.695542  |
| 6 | 0.636449  | -0.358124 | 0.422440  |
| 1 | 0.789013  | -1.242856 | 1.046865  |
| 6 | 1.339581  | 0.855073  | 1.088422  |
| 1 | 0.651429  | 1.681487  | 1.275627  |
| 1 | 1.759336  | 0.567046  | 2.055087  |
| 6 | 1.441202  | -0.540993 | -0.901349 |
| 6 | 2.456370  | 1.243647  | 0.090640  |
| 1 | 1.517322  | -1.586068 | -1.208784 |
| 1 | 0.940988  | 0.003040  | -1.709925 |
| 1 | 3.357131  | 1.630212  | 0.572060  |
| 1 | 2.093870  | 2.017293  | -0.595343 |
| 7 | 2.757791  | 0.045576  | -0.690106 |
| 6 | 3.665049  | -0.854206 | 0.005325  |
| 1 | 3.309605  | -1.186045 | 0.996787  |
| 1 | 3.833195  | -1.743663 | -0.606125 |
| 1 | 4.630414  | -0.361629 | 0.142890  |

Cartesian coordinates of the stationary points involved in the 32CA reaction between AY 18 and benzaldehyde **26**.

#### Benzaldehyde **26**

E = -345.525718314 a.u.

|   |           |           |           |
|---|-----------|-----------|-----------|
| 6 | -1.295825 | -0.770560 | 0.087413  |
| 6 | 0.093839  | -0.778563 | 0.129129  |
| 6 | 0.791783  | 0.418052  | 0.030841  |
| 6 | 0.102008  | 1.620233  | -0.108864 |
| 6 | -1.293010 | 1.623696  | -0.150286 |
| 6 | -1.989334 | 0.429909  | -0.052232 |
| 1 | -1.843305 | -1.704199 | 0.164015  |
| 1 | 0.630037  | -1.714948 | 0.237914  |
| 1 | 1.878179  | 0.420361  | 0.062602  |
| 1 | -1.810012 | 2.570786  | -0.259569 |
| 1 | -3.073532 | 0.429252  | -0.084093 |
| 6 | 0.854058  | 2.893530  | -0.213174 |
| 1 | 1.959408  | 2.787498  | -0.170054 |
| 8 | 0.349278  | 3.979393  | -0.335847 |

**MC-II**

E = -518.711052755 a.u.

|   |           |           |           |
|---|-----------|-----------|-----------|
| 6 | 2.018771  | 0.066473  | 1.407093  |
| 6 | 2.445119  | 0.816001  | -0.812603 |
| 1 | 1.609792  | 0.373617  | 2.357681  |
| 1 | 2.818806  | -0.657058 | 1.356401  |
| 1 | 2.167876  | 1.512583  | -1.586200 |
| 1 | 3.150408  | 0.019564  | -0.989538 |
| 7 | 1.880388  | 0.916164  | 0.375076  |
| 6 | 0.940843  | 2.027241  | 0.590146  |
| 1 | 0.030921  | 1.639886  | 1.045655  |
| 1 | 1.406872  | 2.759201  | 1.250123  |
| 1 | 0.691778  | 2.488660  | -0.361492 |
| 1 | 0.731448  | -2.334040 | 0.980776  |
| 8 | 1.366437  | -1.945809 | -0.898497 |
| 6 | 0.608090  | -1.780020 | 0.030857  |
| 6 | -0.590865 | -0.904323 | -0.046507 |
| 6 | -0.847444 | -0.199807 | -1.220961 |
| 6 | -1.444218 | -0.762750 | 1.047066  |
| 6 | -1.940348 | 0.655701  | -1.292705 |
| 1 | -0.177904 | -0.339261 | -2.062004 |
| 6 | -2.537188 | 0.088040  | 0.975002  |
| 1 | -1.235057 | -1.310574 | 1.962104  |
| 6 | -2.782026 | 0.803493  | -0.195912 |
| 1 | -2.140398 | 1.204758  | -2.207205 |
| 1 | -3.199902 | 0.197580  | 1.827095  |
| 1 | -3.636705 | 1.469807  | -0.253508 |

**TS-II-n**

E = -518.730010747 a.u.

|   |          |           |           |
|---|----------|-----------|-----------|
| 6 | 1.791310 | -0.141506 | 1.332471  |
| 6 | 2.727825 | 0.565128  | -0.708886 |
| 1 | 1.255676 | 0.217112  | 2.201723  |
| 1 | 2.610801 | -0.829218 | 1.492806  |
| 1 | 2.702643 | 1.271633  | -1.523279 |
| 1 | 3.380490 | -0.291083 | -0.723656 |
| 7 | 1.986184 | 0.783731  | 0.346042  |
| 6 | 1.136515 | 1.980735  | 0.393152  |
| 1 | 0.131014 | 1.692304  | 0.695430  |
| 1 | 1.556255 | 2.682483  | 1.115199  |

|   |           |           |           |
|---|-----------|-----------|-----------|
| 1 | 1.094335  | 2.438925  | -0.592635 |
| 1 | 0.762129  | -2.293096 | 0.830686  |
| 8 | 1.403914  | -1.620980 | -0.984507 |
| 6 | 0.675196  | -1.560576 | 0.009770  |
| 6 | -0.628998 | -0.821379 | -0.037891 |
| 6 | -0.974254 | -0.141335 | -1.202952 |
| 6 | -1.489214 | -0.780699 | 1.058635  |
| 6 | -2.151501 | 0.595903  | -1.261172 |
| 1 | -0.300980 | -0.211051 | -2.049840 |
| 6 | -2.665353 | -0.047717 | 1.001679  |
| 1 | -1.220958 | -1.315687 | 1.965478  |
| 6 | -2.995947 | 0.649819  | -0.158579 |
| 1 | -2.415220 | 1.124348  | -2.171023 |
| 1 | -3.328944 | -0.018143 | 1.858977  |
| 1 | -3.915316 | 1.222961  | -0.203468 |

**TS-II-x**

E = -518.727331643 a.u.

|   |           |           |           |
|---|-----------|-----------|-----------|
| 6 | -3.532200 | 0.042740  | -0.516860 |
| 6 | -2.777112 | 1.202627  | -0.379775 |
| 6 | -1.488760 | 1.139970  | 0.134602  |
| 6 | -0.941194 | -0.085078 | 0.508060  |
| 6 | -1.704581 | -1.243328 | 0.377022  |
| 6 | -2.993873 | -1.181712 | -0.132763 |
| 1 | -4.539378 | 0.092376  | -0.915302 |
| 1 | -3.198627 | 2.159685  | -0.667579 |
| 1 | -0.889095 | 2.032875  | 0.271839  |
| 1 | -1.278982 | -2.198239 | 0.673179  |
| 1 | -3.582395 | -2.087373 | -0.230546 |
| 1 | 0.718703  | -1.097207 | 1.533096  |
| 6 | 0.449861  | -0.136328 | 1.058004  |
| 8 | 1.089721  | 0.891335  | 1.310304  |
| 6 | 1.418359  | -0.863425 | -0.878393 |
| 6 | 2.501826  | 1.213462  | -0.714490 |
| 1 | 1.589610  | -1.930522 | -0.927260 |
| 1 | 0.666818  | -0.446728 | -1.534656 |
| 1 | 3.357582  | 1.766821  | -0.364151 |
| 1 | 1.655615  | 1.710116  | -1.161823 |
| 7 | 2.525525  | -0.094037 | -0.680991 |
| 6 | 3.634465  | -0.728269 | 0.038129  |
| 1 | 3.381034  | -0.747537 | 1.099533  |



|   |          |           |           |
|---|----------|-----------|-----------|
| 1 | 3.777563 | -1.739577 | -0.338180 |
| 1 | 4.544365 | -0.151065 | -0.114862 |

**CA-II-n**

E = -518.783450546 a.u.

|   |           |           |           |
|---|-----------|-----------|-----------|
| 6 | 1.568207  | -0.157299 | 1.232866  |
| 6 | 2.652550  | 0.013818  | -0.718644 |
| 1 | 0.939683  | 0.365842  | 1.953667  |
| 1 | 2.217099  | -0.849753 | 1.777233  |
| 1 | 2.931973  | 0.646087  | -1.561974 |
| 1 | 3.447902  | -0.717733 | -0.524511 |
| 7 | 2.395311  | 0.774782  | 0.473278  |
| 6 | 1.727036  | 2.047749  | 0.208352  |
| 1 | 0.780319  | 1.951300  | -0.340098 |
| 1 | 1.524137  | 2.546797  | 1.157789  |
| 1 | 2.399292  | 2.690878  | -0.363705 |
| 1 | 0.781583  | -2.007874 | 0.364216  |
| 8 | 1.449579  | -0.680040 | -1.055287 |
| 6 | 0.749591  | -0.931479 | 0.151276  |
| 6 | -0.699957 | -0.507606 | 0.042339  |
| 6 | -1.203284 | 0.079514  | -1.113522 |
| 6 | -1.557576 | -0.717320 | 1.121922  |
| 6 | -2.537673 | 0.464741  | -1.183195 |
| 1 | -0.538535 | 0.227716  | -1.956174 |
| 6 | -2.889751 | -0.333184 | 1.054293  |
| 1 | -1.180660 | -1.188829 | 2.026498  |
| 6 | -3.384358 | 0.262964  | -0.100801 |
| 1 | -2.917286 | 0.922479  | -2.091144 |
| 1 | -3.544106 | -0.500919 | 1.903679  |
| 1 | -4.425323 | 0.563755  | -0.156810 |

**CA-II-x**

E = -518.783555314 a.u.

|   |           |           |           |
|---|-----------|-----------|-----------|
| 6 | -3.576211 | 0.065845  | -0.342196 |
| 6 | -2.777477 | 1.201928  | -0.310696 |
| 6 | -1.423285 | 1.100267  | -0.011975 |
| 6 | -0.854758 | -0.139983 | 0.257292  |
| 6 | -1.662575 | -1.276279 | 0.232748  |
| 6 | -3.014362 | -1.176325 | -0.067228 |
| 1 | -4.633209 | 0.147015  | -0.573269 |
| 1 | -3.211048 | 2.175779  | -0.514557 |

|   |           |           |           |
|---|-----------|-----------|-----------|
| 1 | -0.798759 | 1.984906  | 0.034296  |
| 1 | -1.230706 | -2.249072 | 0.455321  |
| 1 | -3.632281 | -2.068366 | -0.081408 |
| 1 | 0.767242  | -0.918966 | 1.409840  |
| 6 | 0.623095  | -0.285008 | 0.526910  |
| 8 | 1.263428  | 0.955296  | 0.781707  |
| 6 | 1.398747  | -0.864162 | -0.695841 |
| 6 | 2.223643  | 1.165650  | -0.257763 |
| 1 | 1.561671  | -1.940415 | -0.628487 |
| 1 | 0.844657  | -0.656988 | -1.615927 |
| 1 | 3.043183  | 1.759415  | 0.148092  |
| 1 | 1.750372  | 1.703626  | -1.088991 |
| 7 | 2.658214  | -0.129156 | -0.710836 |
| 6 | 3.666321  | -0.721801 | 0.163454  |
| 1 | 3.350269  | -0.804462 | 1.214417  |
| 1 | 3.918190  | -1.718384 | -0.204211 |
| 1 | 4.575060  | -0.117693 | 0.125720  |

Cartesian coordinates of the stationary points involved in the 32CA reaction between AY 18 and MFB 21.

#### MFB 21

E = -573.384459008 a.u.

|   |           |           |           |
|---|-----------|-----------|-----------|
| 6 | -1.239731 | -0.779842 | 0.035746  |
| 6 | 0.147001  | -0.773894 | 0.059013  |
| 6 | 0.858288  | 0.424553  | -0.016295 |
| 6 | 0.153552  | 1.639501  | -0.098151 |
| 6 | -1.240294 | 1.614157  | -0.115232 |
| 6 | -1.937026 | 0.418281  | -0.054814 |
| 1 | -1.774173 | -1.722245 | 0.087064  |
| 1 | 0.691752  | -1.706365 | 0.127489  |
| 1 | -1.761343 | 2.562920  | -0.172657 |
| 1 | -3.021492 | 0.420489  | -0.074217 |
| 6 | 0.792331  | 2.998700  | -0.114988 |
| 1 | 1.878934  | 3.043945  | 0.032166  |
| 8 | 0.145097  | 4.004333  | -0.266819 |
| 6 | 2.353484  | 0.370435  | -0.059210 |
| 8 | 3.074085  | 1.242662  | -0.472473 |
| 8 | 2.821499  | -0.794695 | 0.405630  |
| 6 | 4.238875  | -0.953203 | 0.357495  |
| 1 | 4.728672  | -0.189842 | 0.963031  |

|   |          |           |           |
|---|----------|-----------|-----------|
| 1 | 4.434295 | -1.943953 | 0.760178  |
| 1 | 4.597754 | -0.877747 | -0.669692 |

**MC-III**

E = -746.572247408 a.u.

|   |           |           |           |
|---|-----------|-----------|-----------|
| 6 | 0.835840  | -2.238121 | 1.087363  |
| 6 | 2.941392  | -1.148405 | 1.336964  |
| 1 | -0.128154 | -2.364393 | 1.555918  |
| 1 | 1.283023  | -3.047885 | 0.529568  |
| 1 | 3.449321  | -0.286697 | 1.739406  |
| 1 | 3.434263  | -1.851781 | 0.685192  |
| 7 | 1.662415  | -1.315491 | 1.611608  |
| 6 | 1.051961  | -0.342381 | 2.532513  |
| 1 | -0.029451 | -0.379084 | 2.434286  |
| 1 | 1.346199  | -0.585500 | 3.553274  |
| 1 | 1.393270  | 0.658308  | 2.271257  |
| 1 | 0.188728  | -1.698428 | -1.534319 |
| 8 | 2.144747  | -1.213391 | -1.595651 |
| 6 | 0.988796  | -0.982666 | -1.313951 |
| 6 | 0.587340  | 0.337649  | -0.725924 |
| 6 | 1.578567  | 1.311199  | -0.627074 |
| 6 | -0.684705 | 0.609847  | -0.201438 |
| 6 | 1.310866  | 2.547923  | -0.053827 |
| 1 | 2.560920  | 1.069537  | -1.015110 |
| 6 | -0.941921 | 1.840264  | 0.396343  |
| 6 | 0.047077  | 2.814949  | 0.455783  |
| 1 | 2.090351  | 3.300890  | -0.001831 |
| 1 | -1.921017 | 2.032017  | 0.819413  |
| 1 | -0.170484 | 3.777199  | 0.906918  |
| 6 | -1.765279 | -0.420704 | -0.229057 |
| 8 | -2.029755 | -1.144600 | -1.151019 |
| 8 | -2.438395 | -0.442309 | 0.935405  |
| 6 | -3.508341 | -1.384283 | 1.004627  |
| 1 | -3.938225 | -1.266240 | 1.996383  |
| 1 | -4.253293 | -1.175760 | 0.235855  |
| 1 | -3.130963 | -2.398552 | 0.867268  |

**TS-III-n**

E = -746.595013107 a.u.

|   |          |           |          |
|---|----------|-----------|----------|
| 6 | 1.213517 | -1.920265 | 0.816929 |
| 6 | 3.363039 | -0.966726 | 0.478706 |

|   |           |           |           |
|---|-----------|-----------|-----------|
| 1 | 0.350409  | -1.911754 | 1.463223  |
| 1 | 1.474180  | -2.804402 | 0.256990  |
| 1 | 4.021101  | -0.146170 | 0.709927  |
| 1 | 3.628283  | -1.731434 | -0.232305 |
| 7 | 2.190723  | -1.032336 | 1.077196  |
| 6 | 1.866060  | 0.007646  | 2.065697  |
| 1 | 0.853709  | 0.366038  | 1.884136  |
| 1 | 1.936222  | -0.422041 | 3.065331  |
| 1 | 2.560883  | 0.837423  | 1.962977  |
| 1 | 0.101819  | -1.689278 | -1.585902 |
| 8 | 1.934834  | -0.915247 | -1.968691 |
| 6 | 0.812196  | -0.864783 | -1.498546 |
| 6 | 0.309687  | 0.416949  | -0.885654 |
| 6 | 1.220983  | 1.473654  | -0.891393 |
| 6 | -0.956577 | 0.619973  | -0.298246 |
| 6 | 0.913341  | 2.698203  | -0.317479 |
| 1 | 2.179970  | 1.293386  | -1.361127 |
| 6 | -1.253827 | 1.857755  | 0.275910  |
| 6 | -0.327541 | 2.891321  | 0.273520  |
| 1 | 1.640739  | 3.502493  | -0.335547 |
| 1 | -2.225626 | 2.003392  | 0.727282  |
| 1 | -0.581710 | 3.844070  | 0.723348  |
| 6 | -1.989530 | -0.458589 | -0.247819 |
| 8 | -1.900177 | -1.554302 | -0.740882 |
| 8 | -3.081032 | -0.075830 | 0.436556  |
| 6 | -4.126019 | -1.043067 | 0.517309  |
| 1 | -4.920589 | -0.568145 | 1.088462  |
| 1 | -4.478565 | -1.311747 | -0.479832 |
| 1 | -3.776873 | -1.944880 | 1.023187  |

**TS-III-x**

E = -746.592998694 a.u.

|   |           |          |           |
|---|-----------|----------|-----------|
| 6 | -1.980030 | 2.696373 | -0.536050 |
| 6 | -0.726464 | 3.142051 | -0.132904 |
| 6 | 0.196451  | 2.242565 | 0.373086  |
| 6 | -0.090800 | 0.879806 | 0.472618  |
| 6 | -1.364099 | 0.430929 | 0.069380  |
| 6 | -2.293434 | 1.352060 | -0.424614 |
| 1 | -2.712450 | 3.391913 | -0.928763 |
| 1 | -0.472712 | 4.194052 | -0.205216 |
| 1 | 1.170515  | 2.566501 | 0.719838  |

|   |           |           |           |
|---|-----------|-----------|-----------|
| 1 | -3.269458 | 0.996272  | -0.725492 |
| 1 | 0.744595  | -1.016283 | 1.276966  |
| 6 | 1.002053  | 0.022783  | 1.054534  |
| 8 | 2.031564  | 0.541057  | 1.485898  |
| 6 | 1.669296  | -0.775447 | -1.104773 |
| 6 | 3.626880  | 0.445815  | -0.610774 |
| 1 | 1.257912  | -1.763610 | -1.232460 |
| 1 | 1.260543  | 0.052901  | -1.664404 |
| 1 | 4.604132  | 0.434414  | -0.158481 |
| 1 | 3.189531  | 1.353420  | -0.996339 |
| 7 | 2.964327  | -0.680160 | -0.734515 |
| 6 | 3.535172  | -1.861110 | -0.075104 |
| 1 | 3.260583  | -1.816985 | 0.979815  |
| 1 | 3.135657  | -2.761223 | -0.537387 |
| 1 | 4.618448  | -1.844435 | -0.179806 |
| 6 | -1.750947 | -1.008546 | 0.123675  |
| 8 | -1.004334 | -1.943900 | 0.279578  |
| 8 | -3.073999 | -1.179170 | -0.038795 |
| 6 | -3.526095 | -2.530873 | -0.030677 |
| 1 | -3.284553 | -3.011058 | 0.919055  |
| 1 | -4.603833 | -2.479833 | -0.168794 |
| 1 | -3.062936 | -3.097245 | -0.840752 |

**TS-IV-n**

E = -746.582283929 a.u.

|   |           |           |           |
|---|-----------|-----------|-----------|
| 6 | 1.438064  | 0.215566  | 1.470501  |
| 6 | 1.637286  | 2.312426  | 0.423456  |
| 1 | 0.930564  | -0.281788 | 2.287590  |
| 1 | 2.513854  | 0.089082  | 1.434741  |
| 1 | 1.148448  | 3.222244  | 0.110120  |
| 1 | 2.621038  | 2.046454  | 0.072761  |
| 7 | 1.014002  | 1.505333  | 1.231116  |
| 6 | -0.313594 | 1.889072  | 1.738617  |
| 1 | -0.831508 | 2.481005  | 0.984603  |
| 1 | -0.889052 | 0.986637  | 1.932815  |
| 1 | -0.187271 | 2.454225  | 2.662714  |
| 1 | -0.325947 | 0.927780  | -2.549603 |
| 8 | -1.185113 | 2.339804  | -1.400401 |
| 6 | -0.872335 | 1.194928  | -1.634320 |
| 6 | -1.305257 | 0.059474  | -0.752853 |
| 6 | -2.667395 | -0.029937 | -0.460936 |

|   |           |           |           |
|---|-----------|-----------|-----------|
| 6 | -0.420998 | -0.883593 | -0.219359 |
| 6 | -3.157566 | -1.073629 | 0.308814  |
| 1 | -3.338824 | 0.723919  | -0.856711 |
| 6 | -0.921813 | -1.935155 | 0.545537  |
| 6 | -2.280593 | -2.035027 | 0.802811  |
| 1 | -4.218680 | -1.140916 | 0.519594  |
| 1 | -0.226085 | -2.660773 | 0.948098  |
| 1 | -2.657520 | -2.859259 | 1.398026  |
| 6 | 1.058410  | -0.666461 | -0.402228 |
| 8 | 1.466935  | 0.198970  | -1.189435 |
| 8 | 1.754345  | -1.841898 | -0.202748 |
| 6 | 3.095401  | -1.818612 | -0.646659 |
| 1 | 3.480345  | -2.826293 | -0.496055 |
| 1 | 3.157431  | -1.538799 | -1.700319 |
| 1 | 3.698197  | -1.110167 | -0.065795 |

**TS-IV-x**

E = -746.577104092 a.u.

|   |           |           |           |
|---|-----------|-----------|-----------|
| 6 | -2.616886 | -2.025882 | -0.622169 |
| 6 | -3.542404 | -0.989431 | -0.632974 |
| 6 | -3.140167 | 0.276109  | -0.244620 |
| 6 | -1.828337 | 0.528818  | 0.161461  |
| 6 | -0.888365 | -0.520318 | 0.166375  |
| 6 | -1.306970 | -1.791366 | -0.230476 |
| 1 | -2.914493 | -3.025831 | -0.918479 |
| 1 | -4.566579 | -1.168291 | -0.939182 |
| 1 | -3.833296 | 1.109224  | -0.239864 |
| 1 | -0.587772 | -2.598255 | -0.222286 |
| 1 | -0.511338 | 2.116729  | 0.956286  |
| 6 | -1.517694 | 1.938322  | 0.553574  |
| 8 | -2.321438 | 2.834636  | 0.444347  |
| 6 | 1.131319  | 0.426109  | -1.327335 |
| 6 | 2.686079  | 1.778015  | -0.193319 |
| 1 | 1.058429  | -0.337208 | -2.091821 |
| 1 | 0.442356  | 1.257791  | -1.406516 |
| 1 | 3.689441  | 1.896881  | 0.184632  |
| 1 | 1.914721  | 2.497385  | 0.027359  |
| 7 | 2.412649  | 0.774642  | -0.980042 |
| 6 | 3.458827  | -0.200274 | -1.309739 |
| 1 | 3.089391  | -1.192764 | -1.056633 |
| 1 | 3.670319  | -0.144188 | -2.377915 |

|   |          |           |           |
|---|----------|-----------|-----------|
| 1 | 4.360961 | 0.018228  | -0.742018 |
| 6 | 0.554261 | -0.321787 | 0.581409  |
| 8 | 0.926552 | 0.560326  | 1.357874  |
| 8 | 1.242518 | -1.539365 | 0.574398  |
| 6 | 2.203341 | -1.680730 | 1.607676  |
| 1 | 1.745933 | -1.563597 | 2.593095  |
| 1 | 2.603492 | -2.689410 | 1.502798  |
| 1 | 3.010817 | -0.949480 | 1.518701  |

**CA-III-n**

E = -746.649796771 a.u.

|   |           |           |           |
|---|-----------|-----------|-----------|
| 6 | 1.133362  | -1.432049 | 0.287004  |
| 6 | 3.052996  | -1.133829 | -0.834067 |
| 1 | 0.585090  | -1.140585 | 1.181715  |
| 1 | 0.847476  | -2.454056 | 0.034496  |
| 1 | 4.051839  | -0.696606 | -0.855740 |
| 1 | 3.052107  | -2.083518 | -1.385572 |
| 7 | 2.576022  | -1.354547 | 0.502782  |
| 6 | 2.958036  | -0.292872 | 1.429304  |
| 1 | 2.617575  | 0.708596  | 1.130092  |
| 1 | 2.543009  | -0.514313 | 2.414519  |
| 1 | 4.045865  | -0.275526 | 1.527676  |
| 1 | 0.277029  | -1.040080 | -1.685867 |
| 8 | 2.151481  | -0.223807 | -1.461702 |
| 6 | 0.859137  | -0.496333 | -0.938518 |
| 6 | 0.150158  | 0.802054  | -0.599002 |
| 6 | 0.867625  | 1.995547  | -0.656488 |
| 6 | -1.209026 | 0.862214  | -0.235322 |
| 6 | 0.279541  | 3.211104  | -0.341236 |
| 1 | 1.903754  | 1.951448  | -0.965342 |
| 6 | -1.793117 | 2.094031  | 0.077879  |
| 6 | -1.056523 | 3.264635  | 0.033707  |
| 1 | 0.868759  | 4.121027  | -0.393793 |
| 1 | -2.838730 | 2.121811  | 0.354772  |
| 1 | -1.524024 | 4.211160  | 0.281915  |
| 6 | -2.050791 | -0.366146 | -0.190345 |
| 8 | -1.657610 | -1.494640 | -0.362215 |
| 8 | -3.339083 | -0.094293 | 0.066000  |
| 6 | -4.206815 | -1.222663 | 0.129451  |
| 1 | -5.193292 | -0.819662 | 0.346224  |
| 1 | -4.212392 | -1.756482 | -0.821786 |

1 -3.890966 -1.906768 0.918356

**CA-III-x**

E = -746.649589615 a.u.

|   |           |           |           |
|---|-----------|-----------|-----------|
| 6 | -2.080517 | 2.873125  | -0.438814 |
| 6 | -0.805269 | 3.295863  | -0.088585 |
| 6 | 0.141945  | 2.375514  | 0.334222  |
| 6 | -0.145295 | 1.013691  | 0.409506  |
| 6 | -1.442968 | 0.589612  | 0.063044  |
| 6 | -2.393320 | 1.527802  | -0.353956 |
| 1 | -2.828836 | 3.585651  | -0.768007 |
| 1 | -0.545772 | 4.348514  | -0.137732 |
| 1 | 1.126240  | 2.707726  | 0.637639  |
| 1 | -3.387322 | 1.186399  | -0.610822 |
| 1 | 0.594574  | -0.625540 | 1.588542  |
| 6 | 0.963943  | 0.069070  | 0.833770  |
| 8 | 2.063950  | 0.774373  | 1.397260  |
| 6 | 1.590630  | -0.708716 | -0.365940 |
| 6 | 3.180535  | 0.592539  | 0.523138  |
| 1 | 1.203850  | -1.721210 | -0.442990 |
| 1 | 1.382637  | -0.182262 | -1.302661 |
| 1 | 4.092776  | 0.658432  | 1.116931  |
| 1 | 3.178878  | 1.379101  | -0.243680 |
| 7 | 3.026247  | -0.689435 | -0.106980 |
| 6 | 3.451948  | -1.791247 | 0.751887  |
| 1 | 2.941152  | -1.816059 | 1.726069  |
| 1 | 3.265966  | -2.736518 | 0.239054  |
| 1 | 4.527205  | -1.715832 | 0.927946  |
| 6 | -1.840333 | -0.844536 | 0.145915  |
| 8 | -1.105920 | -1.766974 | 0.405163  |
| 8 | -3.146386 | -1.026560 | -0.100218 |
| 6 | -3.602729 | -2.375084 | -0.045279 |
| 1 | -3.439163 | -2.795540 | 0.947854  |
| 1 | -4.665702 | -2.332239 | -0.270663 |
| 1 | -3.080063 | -2.988200 | -0.780848 |

**CA-IV-n**

E = -746.612829183 a.u.

|   |          |           |          |
|---|----------|-----------|----------|
| 6 | 1.370182 | 0.058392  | 1.506166 |
| 6 | 1.894498 | 1.664679  | 0.021539 |
| 1 | 0.645942 | -0.223406 | 2.268800 |



|   |           |           |           |
|---|-----------|-----------|-----------|
| 1 | 2.337017  | -0.371199 | 1.783626  |
| 1 | 1.600485  | 2.628791  | -0.393181 |
| 1 | 2.978060  | 1.528422  | -0.069308 |
| 7 | 1.477485  | 1.503491  | 1.383546  |
| 6 | 0.247000  | 2.222489  | 1.716492  |
| 1 | 0.431194  | 3.295375  | 1.636499  |
| 1 | -0.611348 | 1.974909  | 1.080005  |
| 1 | -0.012750 | 2.010239  | 2.755050  |
| 1 | -0.445057 | 0.908193  | -2.464816 |
| 8 | -1.449796 | 2.256785  | -1.366589 |
| 6 | -1.043264 | 1.140208  | -1.568120 |
| 6 | -1.424721 | -0.030875 | -0.705461 |
| 6 | -2.785872 | -0.335133 | -0.639997 |
| 6 | -0.508293 | -0.819777 | -0.009005 |
| 6 | -3.232631 | -1.440166 | 0.067239  |
| 1 | -3.492067 | 0.302144  | -1.161992 |
| 6 | -0.966040 | -1.931036 | 0.696175  |
| 6 | -2.315159 | -2.248351 | 0.728781  |
| 1 | -4.292075 | -1.670123 | 0.102255  |
| 1 | -0.248805 | -2.550353 | 1.224272  |
| 1 | -2.652000 | -3.120094 | 1.279682  |
| 6 | 0.964451  | -0.457787 | 0.085660  |
| 8 | 1.247593  | 0.636486  | -0.753391 |
| 8 | 1.668375  | -1.611807 | -0.296163 |
| 6 | 3.034722  | -1.440920 | -0.602211 |
| 1 | 3.403739  | -2.424779 | -0.887688 |
| 1 | 3.167015  | -0.746932 | -1.436194 |
| 1 | 3.618566  | -1.084743 | 0.255640  |

**CA-IV-x**

E = -746.618934159 a.u.

|   |           |           |           |
|---|-----------|-----------|-----------|
| 6 | -2.556137 | -2.095964 | -0.352681 |
| 6 | -3.486798 | -1.092048 | -0.118350 |
| 6 | -3.043254 | 0.197085  | 0.118940  |
| 6 | -1.680657 | 0.505977  | 0.125509  |
| 6 | -0.736104 | -0.515511 | -0.072113 |
| 6 | -1.199364 | -1.806678 | -0.324179 |
| 1 | -2.883644 | -3.111128 | -0.551457 |
| 1 | -4.548955 | -1.311177 | -0.127912 |
| 1 | -3.745053 | 1.004420  | 0.294994  |
| 1 | -0.474559 | -2.595295 | -0.485147 |

|   |           |           |           |
|---|-----------|-----------|-----------|
| 1 | -0.345481 | 2.278904  | -0.010189 |
| 6 | -1.346195 | 1.951243  | 0.305884  |
| 8 | -2.136519 | 2.759213  | 0.724290  |
| 6 | 1.359291  | 0.184367  | -1.402922 |
| 6 | 2.189435  | 1.506636  | 0.240854  |
| 1 | 1.576946  | -0.643023 | -2.076496 |
| 1 | 0.648947  | 0.861711  | -1.888659 |
| 1 | 3.036340  | 1.561142  | 0.927663  |
| 1 | 1.775635  | 2.511096  | 0.094978  |
| 7 | 2.559815  | 0.908879  | -1.013931 |
| 6 | 3.776555  | 0.102177  | -0.961455 |
| 1 | 3.742465  | -0.701919 | -0.217041 |
| 1 | 3.946041  | -0.342945 | -1.943567 |
| 1 | 4.626065  | 0.755372  | -0.750629 |
| 6 | 0.777014  | -0.304913 | -0.063426 |
| 8 | 1.144766  | 0.707635  | 0.836253  |
| 8 | 1.450240  | -1.507032 | 0.241218  |
| 6 | 1.385071  | -1.901900 | 1.599419  |
| 1 | 0.349528  | -2.019622 | 1.937317  |
| 1 | 1.894396  | -2.862890 | 1.660557  |
| 1 | 1.885819  | -1.176301 | 2.244196  |
